# Supplementary material
Source: Springer Nature journal article supplement (https://www.springermedizin.de/resource/supplementary/13054_2010_8801_MOESM2_ESM.pdf/9732604)

- Patients with complications (n=24)  
◆ Patients without complications (n=46)

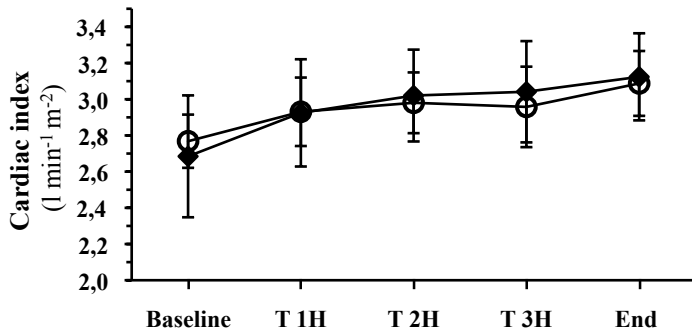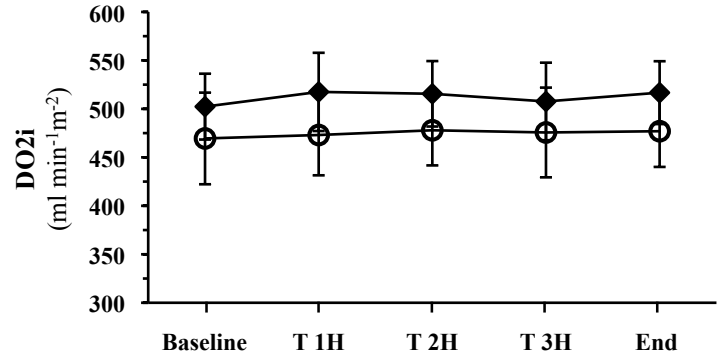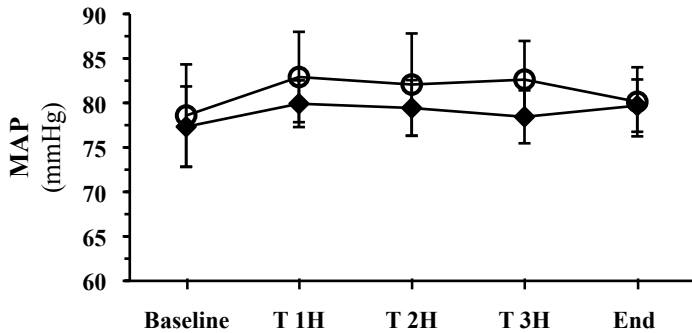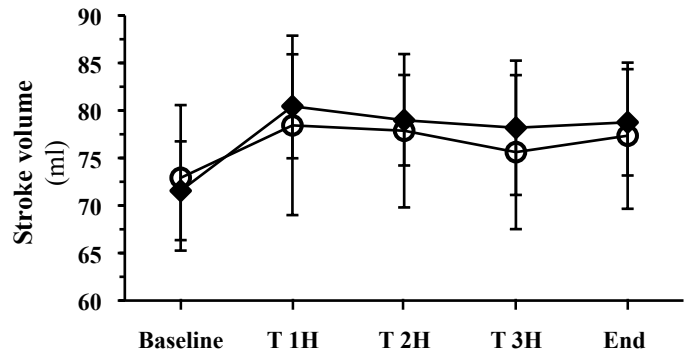

Supplement: MOESM2 [file 9732604]
